# Supplementary material
Source: publisher site journal article supplement (https://www.dovepress.com/article/supplementary_file/615425/615425%20Supplementary%20Material.docx)
Supplement: Supplementary file 1 [file 615425%20Supplementary%20Material.docx]

**Supplementary Table 1. Partial correlations between MoCA domain scores and muscle ultrasound parameters**

| **Domain** | **BB-MT**  ***r* (*P* value)** | **BR-MT**  ***r* (*P* value)** | **RF-MT**  ***r* (*P* value)** | **GL-MT**  ***r* (*P* value)** | **BB-MCSA**  ***r* (*P* value)** | **BR-MCSA**  ***r* (*P* value)** | **RF-MCSA**  ***r* (*P* value)** | **GL-MCSA**  ***r* (*P* value)** |
| --- | --- | --- | --- | --- | --- | --- | --- | --- |
| **Visuospatial skill** | **0.276 (0.002)** | **0.237 (0.008)** | **0.430 (<0.001)** | **0.275 (0.002)** | **0.260 (0.004)** | 0.210 (0.020) | 0.130 (0.153) | **0.247 (0.006)** |
| **Naming** | -0.032 (0.726) | -0.057 (0.530) | 0.139 (0.128) | 0.150 (0.100) | 0.060 (0.513) | -0.069 (0.450) | -0.022 (0.809) | 0.118 (0.194) |
| **Attention** | **0.245 (0.006)** | **0.323 (<0.001)** | **0.450 (<0.001)** | **0.238 (0.008)** | 0.181 (0.045) | 0.188 (0.038) | 0.081 (0.374) | **0.274 (0.002)** |
| **Language** | 0.157 (0.084) | 0.192 (0.034) | 0.011 (0.907) | 0.040 (0.663) | 0.099 (0.279) | 0.152 (0.094) | 0.066 (0.470) | -0.003 (0.976) |
| **Abstract ability** | 0.099 (0.276) | 0.160 (0.079) | 0.090 (0.323) | 0.084 (0.360) | 0.088 (0.338) | 0.068 (0.455) | 0.053 (0.560) | -0.026 (0.774) |
| **Recall (delayed recall)** | 0.126 (0.167) | 0.073 (0.424) | **0.248 (0.006)** | 0.027 (0.770) | 0.070 (0.442) | 0.048 (0.602) | 0.076 (0.404) | -0.075 (0.414) |
| **Orientation** | -0.027 (0.765) | 0.086 (0.345) | **0.249 (0.006)** | 0.030 (0.745) | -0.039 (0.667) | 0.082 (0.371) | 0.041 (0.651) | 0.016 (0.858) |

Adjusted for age, sex, and education years.

**Abbreviations:** MoCA, Montreal Cognitive Assessment; BB, biceps brachii; BR, brachioradialis; RF, rectus femoris; GL, gastrocnemius lateralis; MT, muscle thickness; MCSA, muscle cross-sectional area.

Bold indicates statistical significance (*p* < 0.05)

**Supplementary Table 2. Stratified partial correlations between MoCA total score and muscle ultrasound parameters in the Non-CI and CI groups**

| **Variable** | **Non-CI** | |  | **CI** | |
| --- | --- | --- | --- | --- | --- |
| ***r*** | ***P* value** |  | ***r*** | ***P* value** |
| **BB-MT** | -0.084 | 0.504 |  | -0.047 | 0.736 |
| **BR-MT** | 0.160 | 0.190 |  | 0.166 | 0.231 |
| **RF-MT** | 0.400 | **<0.001** |  | 0.434 | **0.001** |
| **GL-MT** | -0.027 | 0.832 |  | 0.071 | 0.609 |
| **BB-MCSA** | 0.041 | 0.747 |  | -0.095 | 0.493 |
| **BR-MCSA** | 0.131 | 0.299 |  | 0.040 | 0.776 |
| **RF-MCSA** | 0.096 | 0.447 |  | 0.214 | 0.121 |
| **GL-MCSA** | 0.212 | 0.091 |  | 0.052 | 0.710 |
| **BB-SWV** | -0.035 | 0.781 |  | -0.052 | 0.710 |
| **BR-SWV** | 0.067 | 0.597 |  | 0.008 | 0.954 |
| **RF-SWV** | -0.030 | 0.811 |  | -0.023 | 0.867 |
| **GL-SWV** | -0.091 | 0.471 |  | 0.062 | 0.656 |
| **GL-PA** | -0.138 | 0.271 |  | -0.190 | 0.170 |

Adjusted for age, sex, and education years.

**Abbreviations:** Non-CI, non-cognitive impairment; CI, cognitive impairment; BB, biceps brachii; BR, brachioradialis; RF, rectus femoris; GL, gastrocnemius lateralis; MT, muscle thickness; MCSA, muscle cross-sectional area; SWV, shear-wave velocity; PA, pennation angle.

Bold indicates statistical significance (*p* < 0.05)

**Supplementary Table 3. Multivariable linear regression analyses of significant muscle ultrasound parameters associated with MoCA total score**

| **Variable** | **Model 1** | |  | **Model 2** | |  | **Model 3** | |
| --- | --- | --- | --- | --- | --- | --- | --- | --- |
| ***B* (95% *CI)*** | ***P* value** |  | ***B* (95% *CI)*** | ***P* value** |  | ***B* (95% *CI)*** | ***P* value** |
| **BB-MT** | 0.215 (0.066–0.364) | **0.005** |  | 0.186 (0.029–0.342) | **0.020** |  | 0.143 (-0.015–0.301) | 0.075 |
| **BR-MT** | 0.402 (0.170–0.633) | **<0.001** |  | 0.373 (0.134–0.613) | **0.003** |  | 0.054 (-0.214–0.323) | 0.689 |
| **RF-MT** | 0.517 (0.339–0.694) | **<0.001** |  | 0.509 (0.330–0.688) | **<0.001** |  | 0.471 (0.279–0.663) | **<0.001** |
| **GL-MT** | 0.318 (0.062–0.574) | **0.015** |  | 0.266 (-0.004–0.537) | 0.054 |  | — | — |
| **BB-MCSA** | 0.246 (0.019–0.474) | **0.034** |  | 0.188 (-0.048–0.424) | 0.117 |  | — | — |
| **BR-MCSA** | 0.544 (0.088–1.001) | **0.02** |  | 0.407 (-0.077–0.890) | 0.099 |  | — | — |

Model 1: each muscle ultrasound parameter was entered separately into the model adjusted for age, sex, and education years.

Model 2: each muscle ultrasound parameter was entered separately into the model further adjusted for Hcy, TG, 25(OH)D, and ALB.

Model 3: significant muscle ultrasound parameters were simultaneously entered into the same model adjusted for age, sex, and education years.

**Abbreviations:** *95% CI*, 95% confidence interval; BB, biceps brachii; BR, brachioradialis; RF, rectus femoris; GL, gastrocnemius lateralis; MT, muscle thickness; MCSA, muscle cross-sectional area; SWV, shear-wave velocity; PA, pennation angle.

Bold indicates statistical significance (*p* < 0.05)
